# Supplementary material
Source: PubMed Central journal article supplement (PMC5485825)

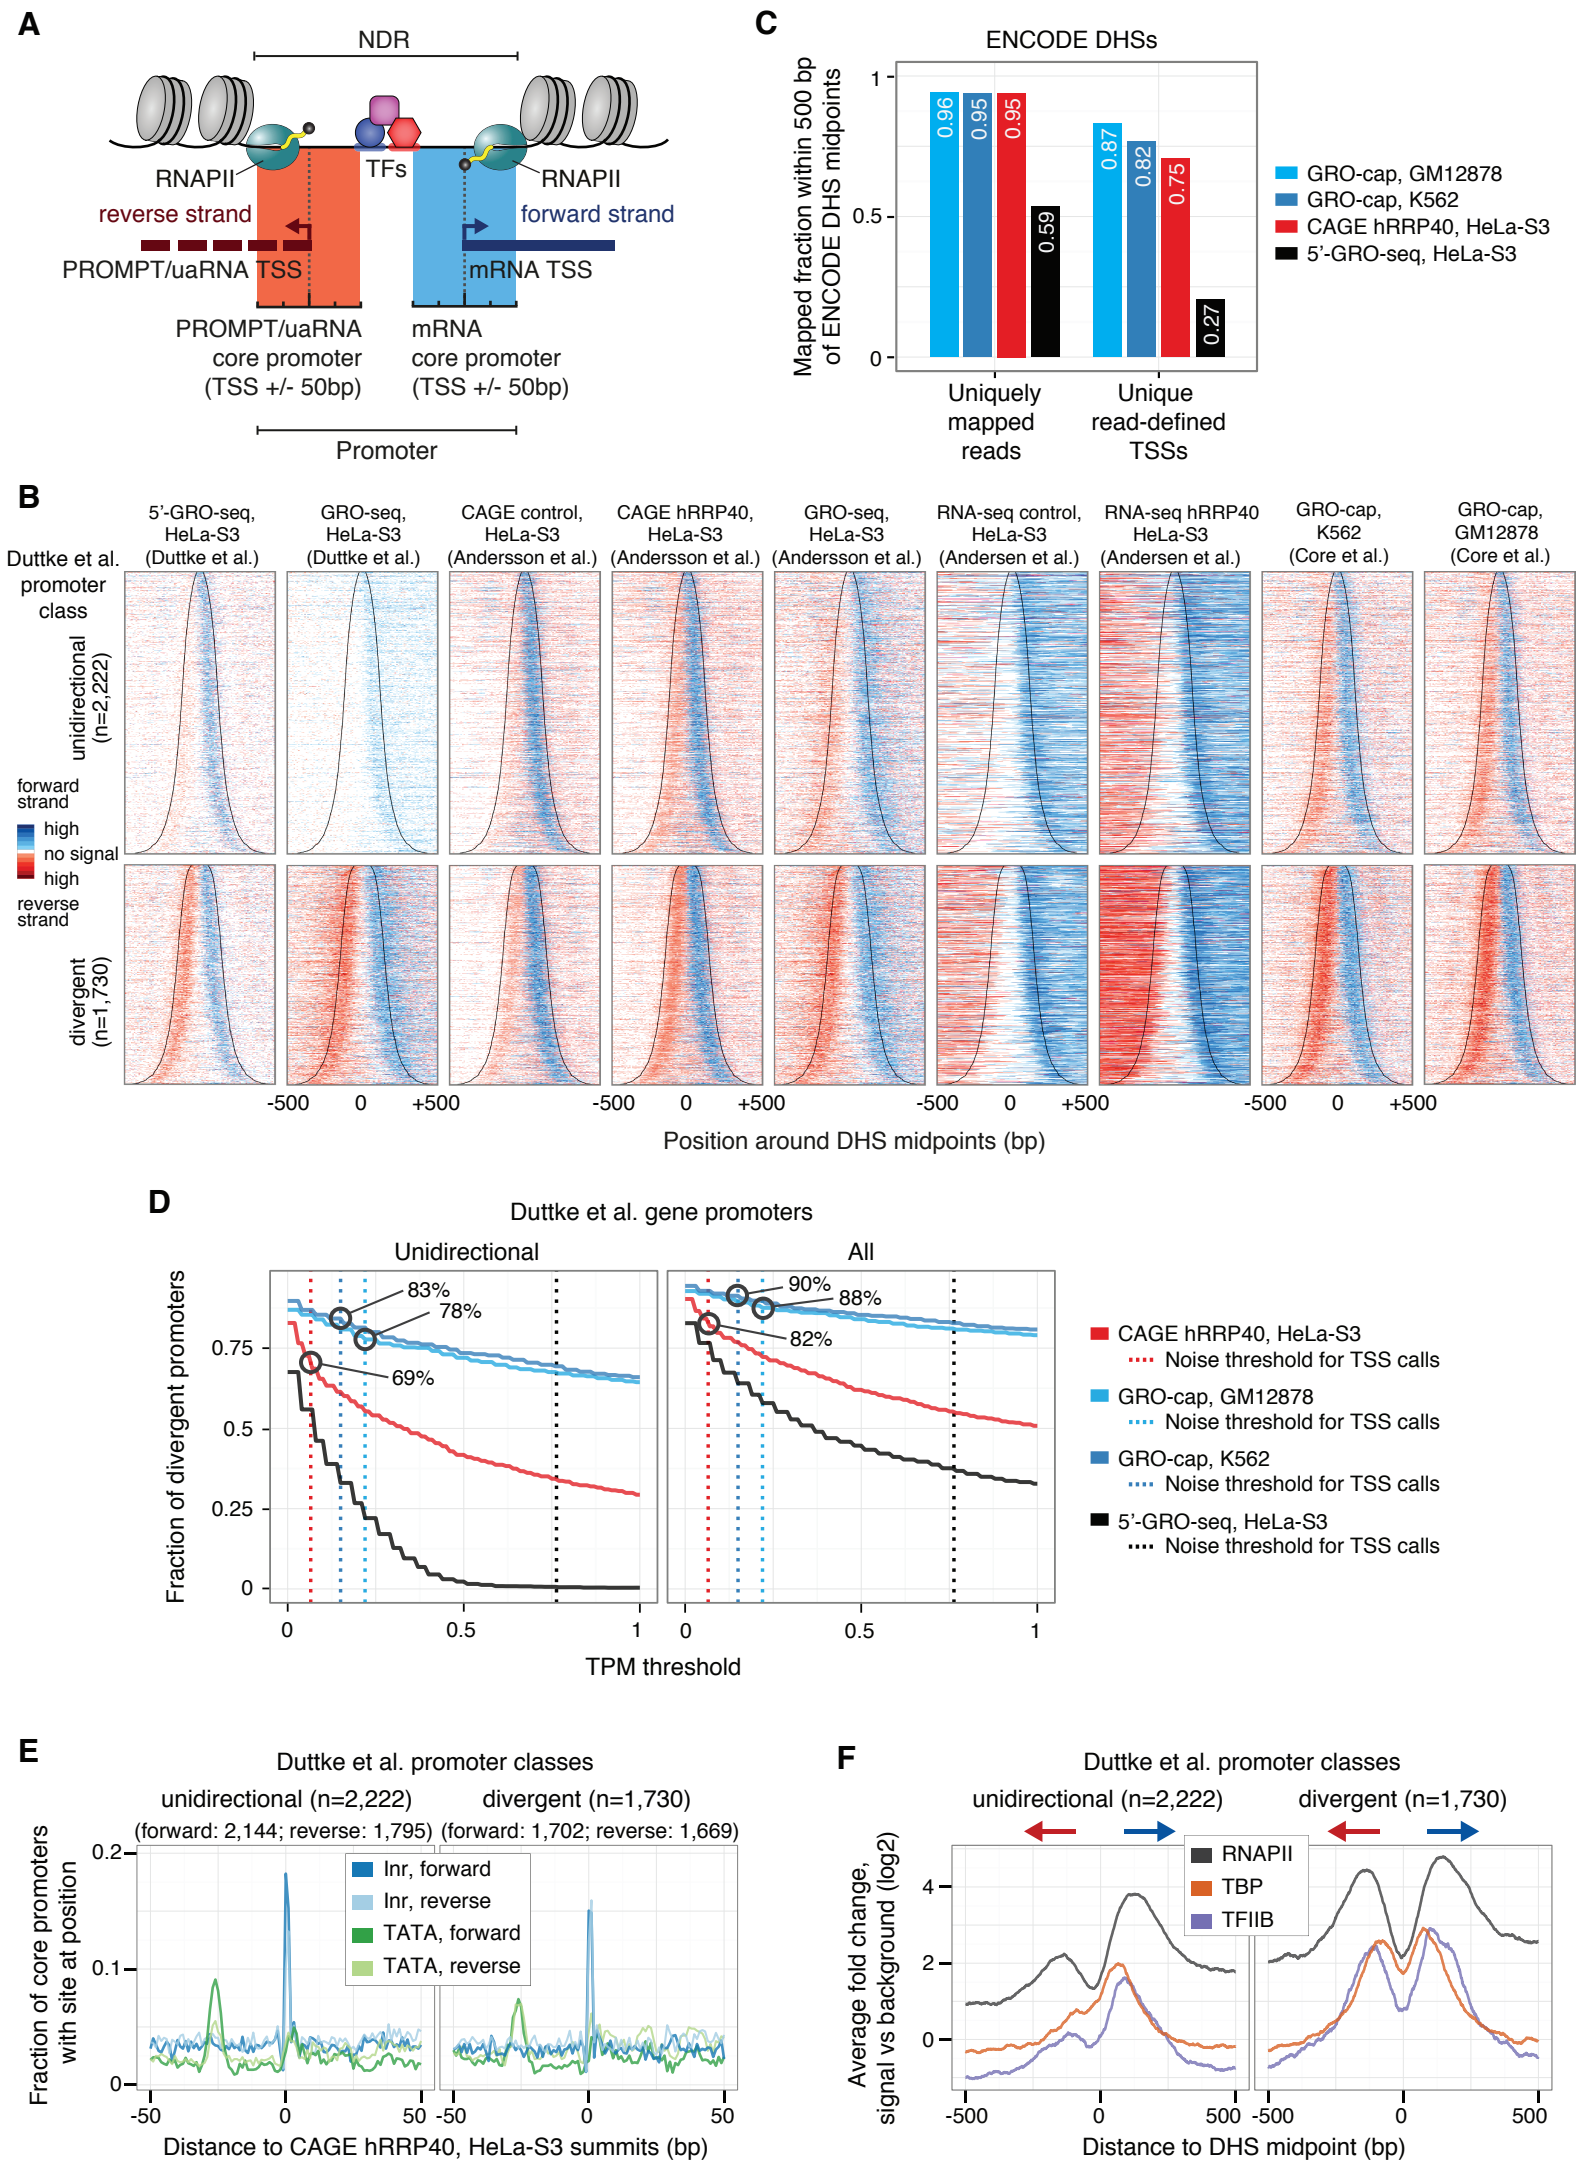

Supplement: NIHMS871123-supplement-Supp_fig.pdf [file NIHMS871123-supplement-Supp_fig.pdf]
